# Supplementary material for: On the role of climate modes in modulating the air-sea CO 2 fluxes in Eastern Boundary Upwelling Systems
Source: Copernicus journal article supplement (doi:10.5194/bg-2018-415), 2018-09-21
Supplement: Supplementary file 1 [file bg-2018-415-supplement.pdf]

## California Current NPGO Composites

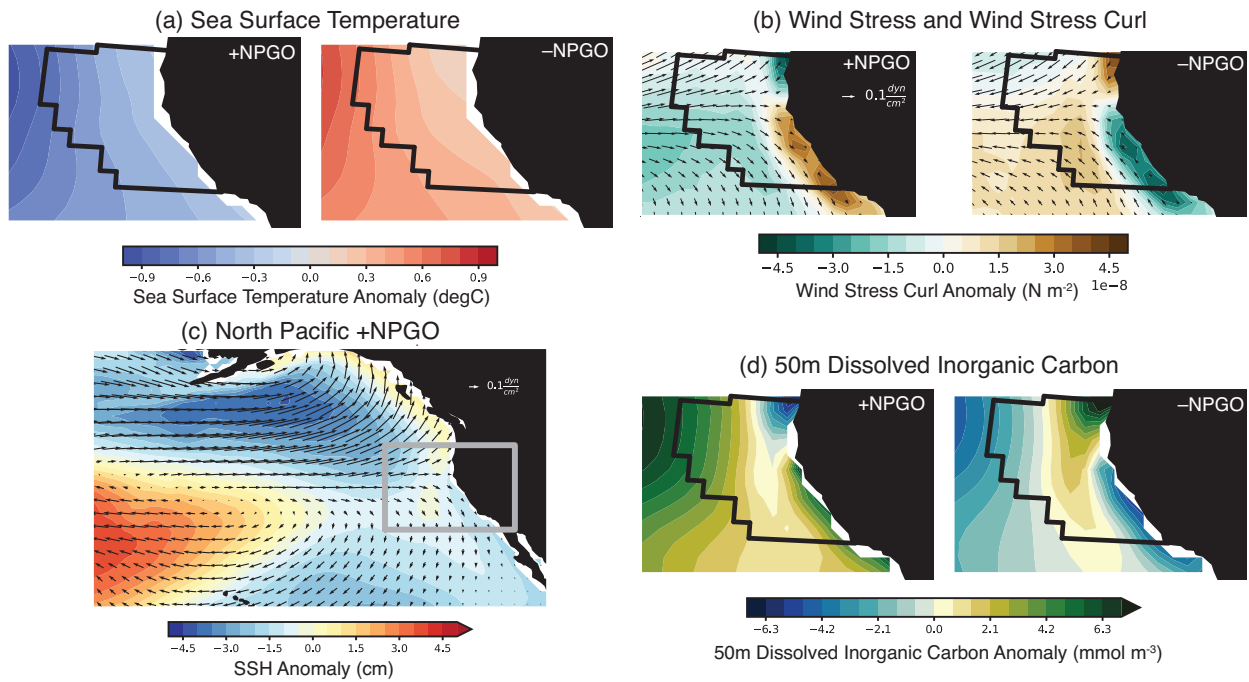

Figure S1: CalCS composites for the positive and negative phase of the NPGO for (a) sea surface temperature, (b) wind stress and wind stress curl, and (d) 50m dissolved inorganic carbon anomalies. The black outline in these plots shows our statistical study region. The positive NPGO forcing pattern for the North Pacific is displayed in (c) for wind stress and sea surface height anomalies. The gray box in (c) delineates the region displayed in (a), (b), and (c). Composites were calculated by averaging every NPGO event that exceeded two standard deviations above or below the index mean for the full ensemble.

## California Current Spatial CO<sub>2</sub> Flux Decomposition

(a) California Current 1 $\sigma$  NPGO Ensemble Mean Response

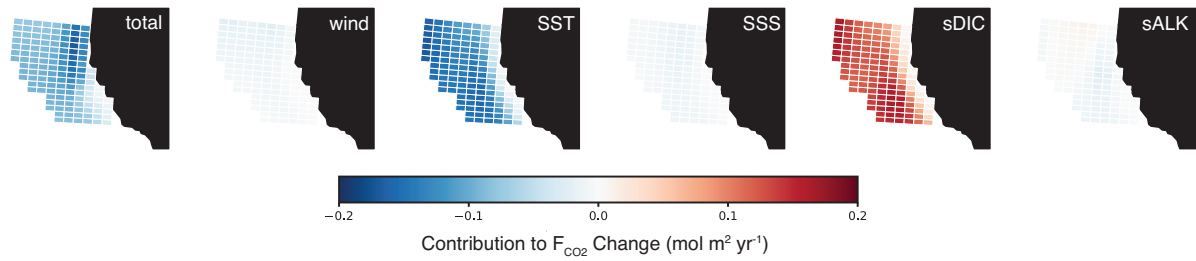

(b) California Current 1 $\sigma$  PDO Ensemble Mean Response

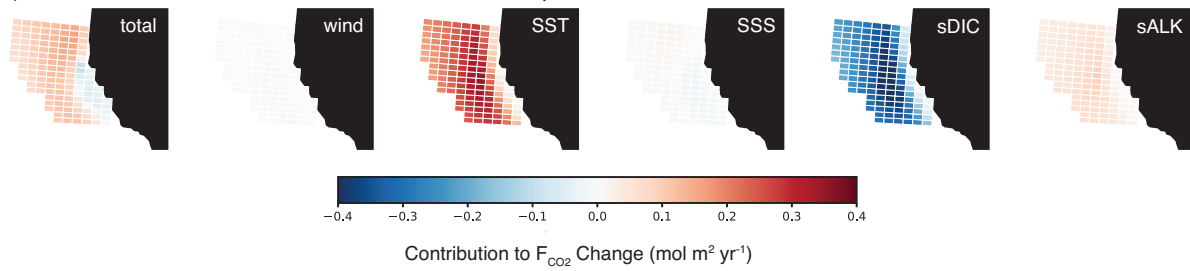

Figure S2: Linear Taylor expansion by grid cell for CO<sub>2</sub> flux anomalies in the CalCS in response to (a) a 1 $\sigma$  NPGO and (b) a 1 $\sigma$  PDO.

### California Current PDO Composites

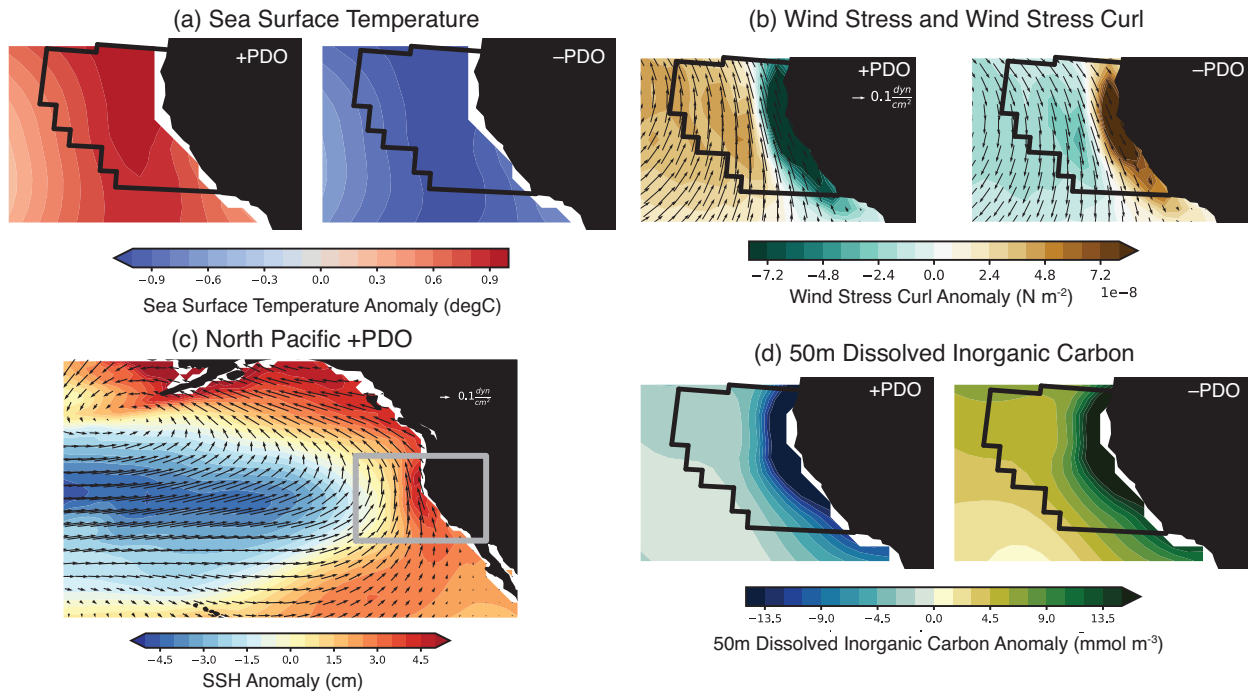

Figure S3: As in Figure S1, but for the PDO.

## Humboldt Current Nino3 Composites

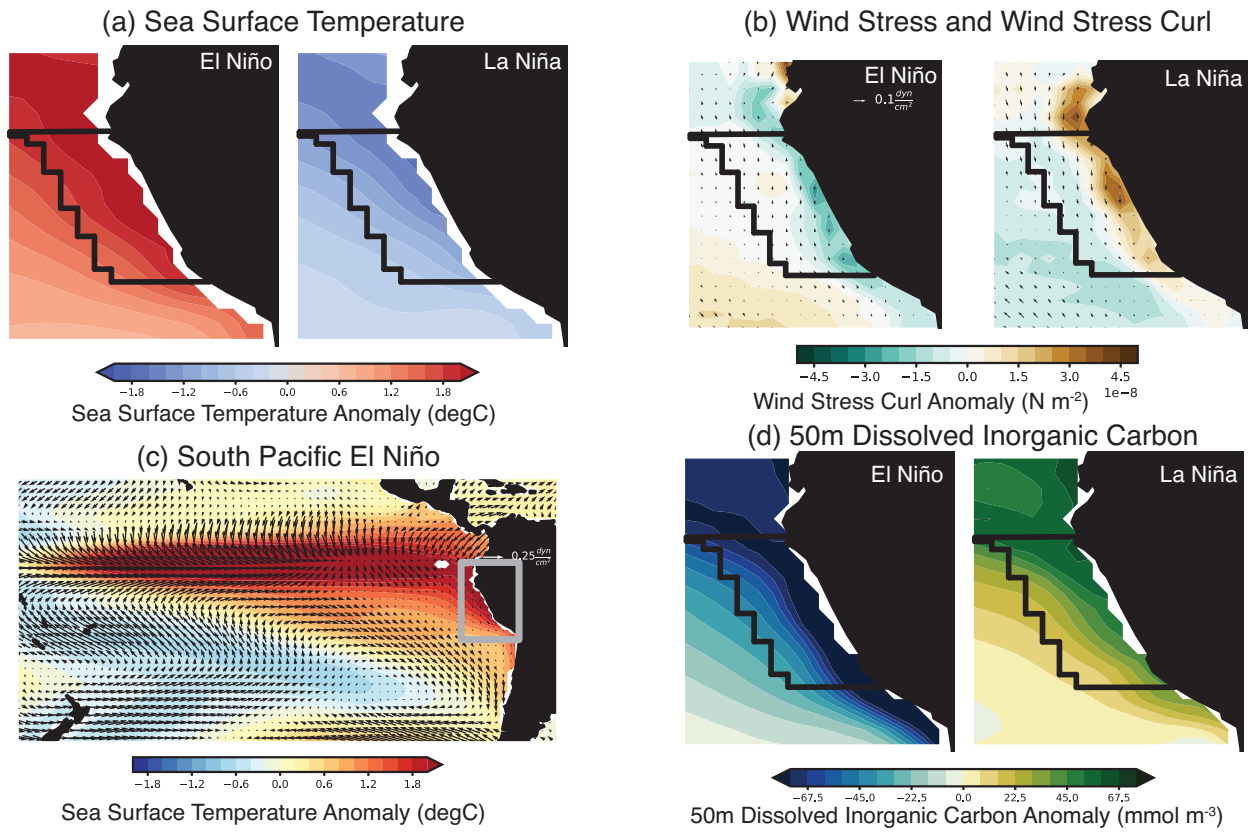

Figure S4: As in Figure S1, but for the HumCS response to ENSO.

### Canary Current NAO Composites

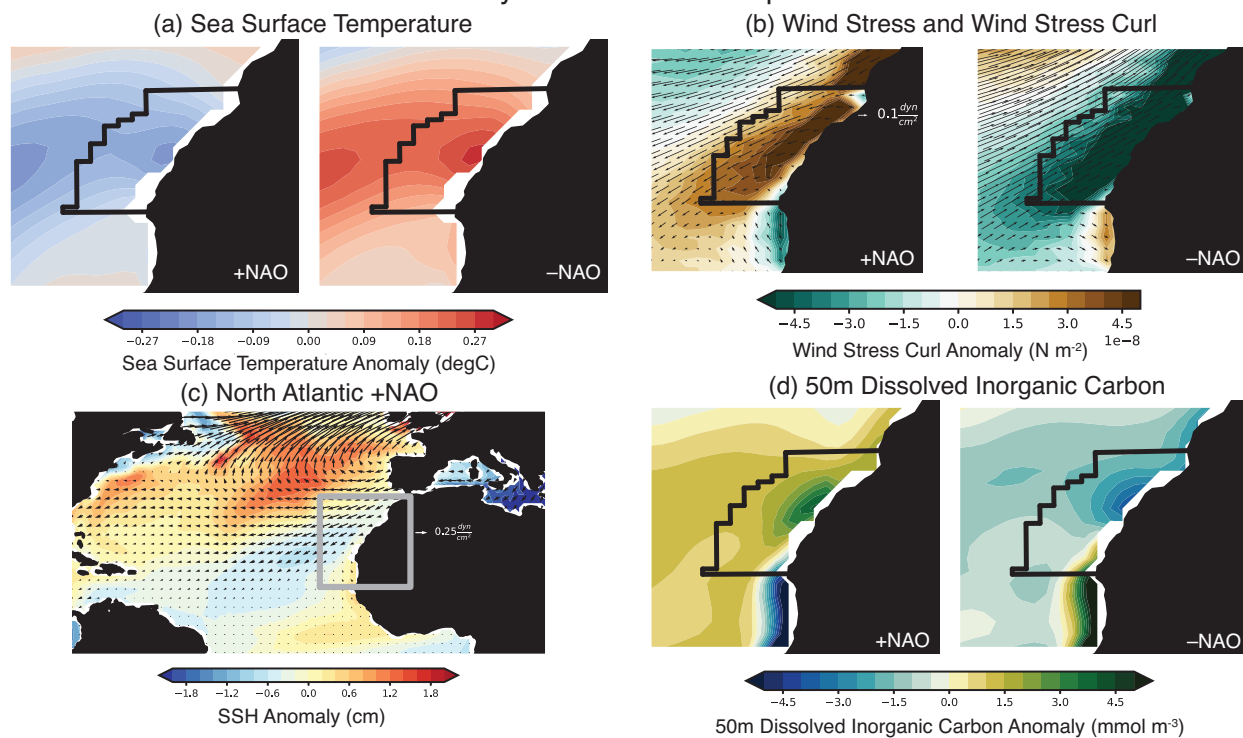

Figure S5: As in Figure S1, but for the CanCS response to the NAO.

## Humboldt and Canary Current Spatial CO<sub>2</sub> Flux Decomposition

(a) Humboldt Current 1° Nino3 Ensemble Mean Response

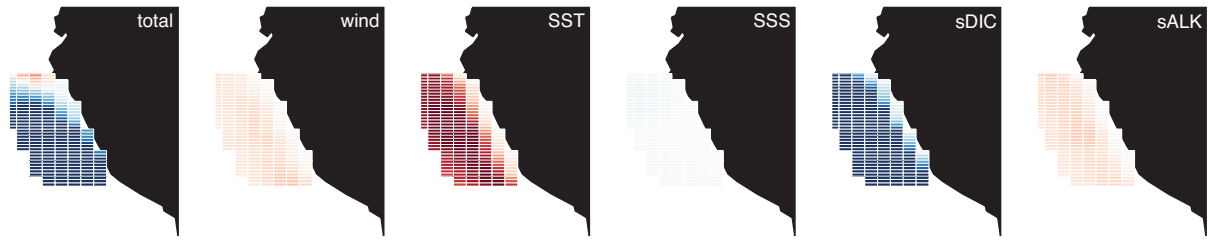

(b) Canary Current 1σ NAO Ensemble Mean Response

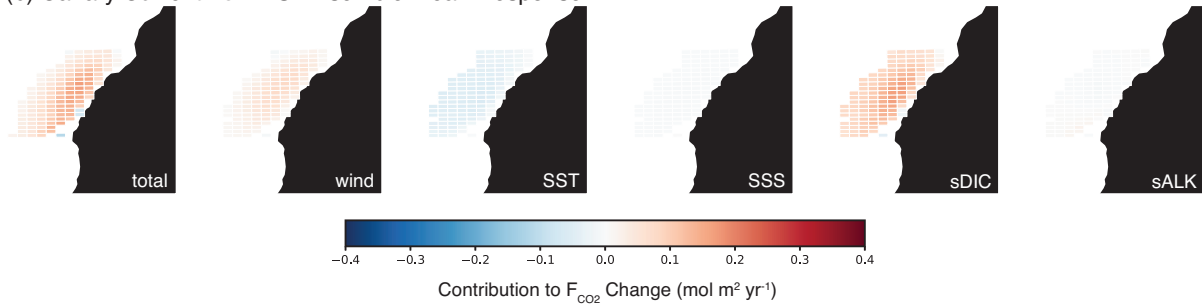

Figure S6: As in Figure S2, but for (a) the HumCS response to ENSO, and (b) the CanCS response to the NAO.

## Relative Contributions to sDIC Tendency Anomaly by Grid Cell

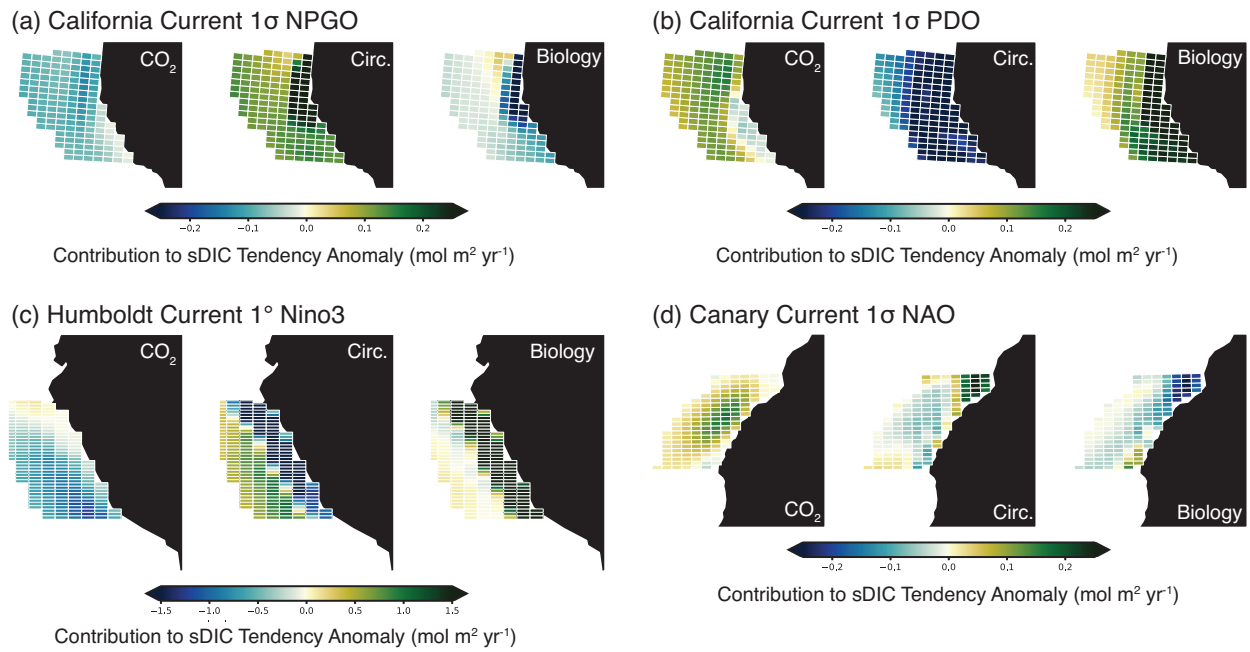

Figure S7: Grid cell analysis of the relative contributions to the sDIC tendency anomaly for (a) the CalCS response to the NPGO, (b) the CalCS response to the PDO, (c) the HumCS response to ENSO, and (d) the CanCS response to the NAO. Each subplot contains (from left to right) the relative contribution of CO<sub>2</sub> flux, circulation, and biology anomalies.
